# Supplementary material for: Unbiased analysis of potential targets of breast cancer susceptibility loci by Capture Hi-C
Source: HighWire-hosted journal article supplement (doi:10.1101/gr.175034.114), 2014-08-13
Supplement: Supp_tables.docx [file Supp_tables.docx]

Supplementary tables

**Supplementary Table 1: Captured genomic regions**

| Type of region | Locus | Coordinates (bps) | Size (kb) | HindIII fragments |
| --- | --- | --- | --- | --- |
| Risk locus | 2q35 | 217610272 - 218359846 | 750 | 227 |
| Risk locus | 8q24.21 | 127888336 - 128469498 | 581 | 192 |
| Risk locus | 9q31.2 | 110759922 - 111097304 | 337 | 100 |
| Random region | 18q12.3 | 38500001 - 39250000 | 750 | 259 |
| Random region | 16q22.3-23.1 | 73600001 - 74180000 | 580 | 190 |
| Random region | 3p12.2 | 82600001 - 82937000 | 337 | 109 |

**Supplementary Table 2: QC statistics for 6 CHi-C libraries**

| **Library** | **Mapped di-tags** | **Valid** | **Valid (%)** | **Deduplicated** | **Deduplicated (%)** | **On target** | **On target (%)** | **Cis** | **Cis (%)** | **Trans** | **Trans (%)** |
| --- | --- | --- | --- | --- | --- | --- | --- | --- | --- | --- | --- |
| SUM44 (i) | 65,503,601 | 42,133,017 | 64.3 | 34,724,871 | 82.4 | 3,854,283 | 11.1 | 2,322,875 | 60.3 | 1,531,408 | 39.7 |
| SUM44 (ii) | 84,049,217 | 49,889,201 | 59.4 | 43,643,131 | 87.5 | 3,602,009 | 8.3 | 2,066,839 | 57.4 | 1,535,170 | 42.6 |
| BT483 (i) | 98,892,182 | 19,828,606 | 20.1 | 18,005,793 | 90.8 | 2,274,150 | 12.6 | 984,513 | 43.3 | 1,289,637 | 56.7 |
| BT483 (ii) | 88,651,314 | 44,726,068 | 50.5 | 40,736,412 | 91.1 | 5,925,299 | 14.5 | 2,127,839 | 35.9 | 3,797,460 | 64.1 |
| GM06990 (i) | 62,183,723 | 41,522,893 | 66.8 | 38,792,658 | 93.4 | 2,853,796 | 7.4 | 1,370,237 | 48.0 | 1,483,559 | 52.0 |
| GM06990 (ii) | 67,883,324 | 34,429,844 | 50.7 | 30,714,809 | 89.2 | 4,629,910 | 15.1 | 1,485,649 | 32.1 | 3,144,261 | 67.9 |

**Supplementary Table 3: Data sets for histone modifications, markers of genome organization (CTCF/RAD21) and the transcription factors ESR1 and FOXA1 from the ENCODE project, Frietze and colleagues (2012) and Hurtado and colleagues (2011)**

| MCF7 | |
| --- | --- |
| CTCF | MCF-7 CTCF TFBS ChIP-seq Peaks from ENCODE/OpenChrom-UTA |
| RAD21 | MCF-7 RAD21 v042211.1 ChIP-seq Peaks Rep 1 from ENCODE/HAIB |
| H3K4me1 | GSM946849_MCF7_H3K4me1_peaks.gff.gz |
| H3K4me3 | MCF-7 H3K4me3 Histone Mod ChIP-seq Peaks 1 from ENCODE/UW |
| H3K27Ac | MCF-7 H3K27ac Histone Modifications by ChIP-seq Peaks from ENCODE/SYDH |
| H3K27me3 | MCF-7 H3K27me3 Histone Modifications by ChIP-seq Peaks from ENCODE/SYDH |
| ESR1 | http://www.carroll-lab.org.uk/FreshFiles/Data/Data_Sheet_3/MCF7_ER_binding.bed |
| FOXA1 | http://www.carroll-lab.org.uk/FreshFiles/Data/Data_Sheet_3/MCF7_FOXA1%20binding.bed |
| GM12878 | |
| CTCF | GM12878 CTCF TFBS ChIP-seq Density Signal ENCODE/OpenChrom-UTA |
| RAD21 | GM12878 RAD21 v041610.1 ChIP-seq Peaks Rep 1 from ENCODE/HAIB |
| H3K4me1 | GM12878 H3K4me1 Histone Mods by ChIP-seq Peaks from ENCODE/Broad |
| H3K4me3 | GM12878 H3K4me3 Histone Mods by ChIP-seq Peaks from ENCODE/Broad |
| H3K27Ac | GM12878 H3K27ac Histone Mods by ChIP-seq Peaks from ENCODE/Broad |
| H3K27me3 | GM12878 H3K27me3 Histone Mods by ChIP-seq Peaks from ENCODE/Broad |

**Supplementary Table 4: Statistically significant interaction peaks between bait fragments mapping to 2q35 and targets within 5Mb either side of the capture region**

| BT483 libraries | | | | | | | |
| --- | --- | --- | --- | --- | --- | --- | --- |
| Capture region | HindIII fragment | Bait_start | Bait_end | Feature | Target_start | Target_end | PFDR |
| 2q35 | 3 | 217621942 | 217623592 | *DIRC3* | 218575164 | 218576102 | 0.008968 |
| 2q35 | 82 | 217912886 | 217925467 | *IGFBP5* | 217560727 | 217563272 | 0.000943 |
| 2q35 | 82 | 217912886 | 217925467 | *IGFBP5* | 217563273 | 217565782 | 0.000758 |
| 2q35 | 84 | 217927200 | 217927769 | *IGFBP5* | 217560727 | 217563272 | 0.001985 |
| 2q35 | 122 | 218022665 | 218026370 | *IGFBP5* | 217560727 | 217563272 | 0.003633 |
| 2q35 | 124 | 218027482 | 218030973 | *IGFBP5* | 217560727 | 217563272 | 0.000118 |
| 2q35 | 125 | 218030974 | 218036250 | *IGFBP5* | 217563273 | 217565782 | 0.00321 |
| 2q35 | 187 | 218230849 | 218232200 | *IGFBP5* | 217560727 | 217563272 | 0.000747 |
| 2q35 | 187 | 218230849 | 218232200 | *DIRC3* | 218372522 | 218374218 | 2.31E-05 |
| 2q35 | 187 | 218230849 | 218232200 | *DIRC3* | 218374766 | 218375365 | 2.48E-06 |
| 2q35 | 187 | 218230849 | 218232200 | *DIRC3* | 218375366 | 218376342 | 2.41E-10 |
| 2q35 | 188 | 218232201 | 218236450 | *IGFBP5* | 217560727 | 217563272 | 0.000247 |
| 2q35 | 188 | 218232201 | 218236450 | *DIRC3* | 218374766 | 218375365 | 0.003502 |
| 2q35 | 188 | 218232201 | 218236450 | *DIRC3* | 218375366 | 218376342 | 1.61E-06 |
| 2q35 | 195 | 218250629 | 218252882 | *IGFBP5* | 217560727 | 217563272 | 0.000853 |
| 2q35 | 195 | 218250629 | 218252882 | *DIRC3* | 218374766 | 218375365 | 0.001057 |
| 2q35 | 195 | 218250629 | 218252882 | *DIRC3* | 218375366 | 218376342 | 2.82E-09 |
| 2q35 | 197 | 218252928 | 218253864 | *IGFBP5* | 217560727 | 217563272 | 0.000759 |
| 2q35 | 197 | 218252928 | 218253864 | *DIRC3* | 218374766 | 218375365 | 0.000902 |
| 2q35 | 197 | 218252928 | 218253864 | *DIRC3* | 218375366 | 218376342 | 8.39E-08 |
|  |  |  |  |  |  |  |  |
| SUM44 libraries | | | | | | | |
| 2q35 | 3 | 217621942 | 217623592 | *DIRC3* | 218618653 | 218619331 | 0.009336 |
| 2q35 | 4 | 217623593 | 217631107 | *DIRC3* | 218552747 | 218555511 | 0.009429 |
| 2q35 | 4 | 217623593 | 217631107 | *DIRC3* | 218580319 | 218587644 | 0.009309 |
| 2q35 | 10 | 217640472 | 217640852 | *IGFBP5* | 217563273 | 217565782 | 0.002401 |
| 2q35 | 10 | 217640472 | 217640852 | *DIRC3* | 218375366 | 218376342 | 0.004881 |
| 2q35 | 10 | 217640472 | 217640852 | *DIRC3* | 218552747 | 218555511 | 0.005142 |
| 2q35 | 10 | 217640472 | 217640852 | *DIRC3* | 218576103 | 218580318 | 2.10E-06 |
| 2q35 | 10 | 217640472 | 217640852 | *DIRC3* | 218587645 | 218596978 | 0.007355 |
| 2q35 | 10 | 217640472 | 217640852 | *DIRC3* | 218596979 | 218597734 | 0.004496 |
| 2q35 | 98 | 217949755 | 217955319 | *IGFBP5* | 217560727 | 217563272 | 0.002842 |
| 2q35 | 118 | 218015577 | 218015936 | *IGFBP5* | 217560727 | 217563272 | 0.004979 |
| 2q35 | 124 | 218027482 | 218030973 | *IGFBP5* | 217560727 | 217563272 | 0.004466 |
| 2q35 | 125 | 218030974 | 218036250 | *IGFBP5* | 217560727 | 217563272 | 5.09E-06 |
| 2q35 | 125 | 218030974 | 218036250 | *DIRC3* | 218375366 | 218376342 | 0.001937 |
| 2q35 | 135 | 218052434 | 218059254 | *IGFBP5* | 217560727 | 217563272 | 0.001164 |
| 2q35 | 171 | 218173938 | 218182158 | *IGFBP5* | 217563273 | 217565782 | 0.000883 |
| 2q35 | 187 | 218230849 | 218232200 | *IGFBP5* | 217552337 | 217560726 | 0.009429 |
| 2q35 | 187 | 218230849 | 218232200 | *IGFBP5* | 217560727 | 217563272 | 0.000716 |
| 2q35 | 187 | 218230849 | 218232200 | *IGFBP5* | 217563273 | 217565782 | 0.009579 |
| 2q35 | 187 | 218230849 | 218232200 | *DIRC3* | 218375366 | 218376342 | 0.001731 |
| 2q35 | 188 | 218232201 | 218236450 | *IGFBP5* | 217552337 | 217560726 | 0.007259 |
| 2q35 | 188 | 218232201 | 218236450 | *IGFBP5* | 217560727 | 217563272 | 0.000425 |
| 2q35 | 188 | 218232201 | 218236450 | *IGFBP5* | 217563273 | 217565782 | 0.008603 |
| 2q35 | 188 | 218232201 | 218236450 | *DIRC3* | 218375366 | 218376342 | 0.001113 |
| 2q35 | 189 | 218236451 | 218236793 | *IGFBP5* | 217552337 | 217560726 | 0.004705 |
| 2q35 | 189 | 218236451 | 218236793 | *IGFBP5* | 217560727 | 217563272 | 0.006686 |
| 2q35 | 189 | 218236451 | 218236793 | *IGFBP5* | 217563273 | 217565782 | 0.008925 |
| 2q35 | 189 | 218236451 | 218236793 | *IGFBP5* | 217565783 | 217570353 | 0.007319 |
| 2q35 | 189 | 218236451 | 218236793 | *DIRC3* | 218375366 | 218376342 | 0.001875 |
| 2q35 | 190 | 218236794 | 218241714 | *IGFBP5* | 217560727 | 217563272 | 0.009211 |
| 2q35 | 190 | 218236794 | 218241714 | *DIRC3* | 218375366 | 218376342 | 0.002199 |
| 2q35 | 193 | 218245708 | 218250147 | *IGFBP5* | 217560727 | 217563272 | 0.009415 |
| 2q35 | 194 | 218250148 | 218250628 | *IGFBP5* | 217563273 | 217565782 | 0.006508 |
| 2q35 | 194 | 218250148 | 218250628 | *DIRC3* | 218375366 | 218376342 | 0.009461 |
| 2q35 | 196 | 218252883 | 218252927 | *DIRC3* | 218375366 | 218376342 | 0.007276 |
| 2q35 | 197 | 218252928 | 218253864 | *IGFBP5* | 217560727 | 217563272 | 0.004435 |
| 2q35 | 197 | 218252928 | 218253864 | *IGFBP5* | 217563273 | 217565782 | 0.007327 |
| 2q35 | 197 | 218252928 | 218253864 | *DIRC3* | 218374766 | 218375365 | 0.009387 |
| 2q35 | 197 | 218252928 | 218253864 | *DIRC3* | 218375366 | 218376342 | 0.00032 |
| 2q35 | 200 | 218254339 | 218261778 | *IGFBP5* | 217552337 | 217560726 | 0.009645 |
| 2q35 | 200 | 218254339 | 218261778 | *IGFBP5* | 217560727 | 217563272 | 0.005927 |
| 2q35 | 200 | 218254339 | 218261778 | *IGFBP5* | 217563273 | 217565782 | 0.004337 |
| 2q35 | 200 | 218254339 | 218261778 | *DIRC3* | 218375366 | 218376342 | 0.000767 |
| 2q35 | 201 | 218261779 | 218268361 | *IGFBP5* | 217560727 | 217563272 | 0.009543 |
| 2q35 | 201 | 218261779 | 218268361 | IGFBP5 | 217563273 | 217565782 | 0.009593 |

**Supplementary Table 5: Statistically significant interaction peaks between bait fragments mapping to 9q31.2 and targets within 5Mb either side of the capture region**

| BT483 libraries | | | | | | | |
| --- | --- | --- | --- | --- | --- | --- | --- |
| Capture region | HindIII fragment | Bait_start | Bait_end | Feature | Target_start | Target_end | PFDR |
| 9q31.2 | 74 | 111033955 | 111035778 | *KLF4* | 110238956 | 110241987 | 0.000673 |
| 9q31.2 | 74 | 111033955 | 111035778 | *KLF4* | 110241988 | 110244649 | 3.54E-05 |
| 9q31.2 | 74 | 111033955 | 111035778 | *KLF4* | 110244650 | 110255868 | 0.000357 |
| 9q31.2 | 74 | 111033955 | 111035778 | *lncRNA** | 110275212 | 110280502 | 0.009035 |
|  |  |  |  |  |  |  |  |
| * in RefSeq annotation(<http://www.ncbi.nlm.nih.gov/refseq/>) but not GENCODE there is a lncRNA mapping 110275212-110280502 with several transcripts: TCONS_00016120-22 and TCONS_00016666 | | | | | | |  |

**Supplementary Table 6: Statistically significant interaction peaks between bait fragments mapping to 8q24.21 and targets within 5Mb either side of the capture region**

| BT483 libraries | | | | | | | |
| --- | --- | --- | --- | --- | --- | --- | --- |
| Capture region | HindIII fragment | Bait_start | Bait_end | Feature | Target_start | Target_end | PFDR |
| 8q24.21 | 1 | 127886760 | 127889453 | *MYC* | 128745991 | 128756979 | 0.007195 |
| 8q24.21 | 1 | 127886760 | 127889453 | *CCDC26* | 130558006 | 130562996 | 0.008732 |
| 8q24.21 | 2 | 127889454 | 127891696 | *MYC* | 128740188 | 128745990 | 0.002133 |
| GM06990 libraries | | | | | | | |
| 8q24.21 | 1 | 127886760 | 127889453 | *enhancer(2)* | 128561308 | 128564572 | 0.001992 |
| 8q24.21 | 1 | 127886760 | 127889453 |  | 128926746 | 128928564 | 0.009766 |
| 8q24.21 | 1 | 127886760 | 127889453 |  | 129121299 | 129122606 | 0.007381 |
| 8q24.21 | 2 | 127889454 | 127891696 | *CCDC26* | 130558006 | 130562996 | 0.0039 |
| 8q24.21 | 102 | 128182973 | 128186396 | *MYC* | 128745991 | 128756979 | 0.006393 |
| 8q24.21 | 109 | 128189518 | 128192177 | *enhancer(2)* | 128561308 | 128564572 | 0.004801 |
| 8q24.21 | 109 | 128189518 | 128192177 | *enhancer(2)* | 128568986 | 128570345 | 0.004053 |
| 8q24.21 | 109 | 128189518 | 128192177 | *enhancer(2)* | 128579914 | 128588131 | 7.84E-05 |
| 8q24.21 | 109 | 128189518 | 128192177 | *MYC* | 128736779 | 128738569 | 0.009012 |
| 8q24.21 | 109 | 128189518 | 128192177 | *MYC* | 128738570 | 128740187 | 0.000546 |
| 8q24.21 | 109 | 128189518 | 128192177 | *MYC* | 128740188 | 128745990 | 0.000509 |
| 8q24.21 | 109 | 128189518 | 128192177 | *MYC* | 128745991 | 128756979 | 6.22E-06 |
| 8q24.21 | 109 | 128189518 | 128192177 |  | 128764090 | 128767053 | 0.009841 |
| 8q24.21 | 109 | 128189518 | 128192177 |  | 128767054 | 128772659 | 0.009618 |
| 8q24.21 | 109 | 128189518 | 128192177 | *PVT1* | 128808279 | 128811894 | 0.00213 |
| 8q24.21 | 109 | 128189518 | 128192177 |  | 128812600 | 128816371 | 0.006321 |
| 8q24.21 | 109 | 128189518 | 128192177 |  | 129026924 | 129031576 | 0.001827 |
| 8q24.21 | 109 | 128189518 | 128192177 |  | 129324805 | 129327116 | 0.001042 |
| 8q24.21 | 109 | 128189518 | 128192177 | *CCDC26* | 130562997 | 130566850 | 6.16E-05 |
| 8q24.21 | 110 | 128192178 | 128201573 | *enhancer(2)* | 128565428 | 128568949 | 3.56E-05 |
| 8q24.21 | 110 | 128192178 | 128201573 | *enhancer(2)* | 128568986 | 128570345 | 0.001778 |
| 8q24.21 | 110 | 128192178 | 128201573 | *enhancer(2)* | 128570346 | 128572043 | 0.001752 |
| 8q24.21 | 110 | 128192178 | 128201573 | *enhancer(2)* | 128572044 | 128572966 | 0.000113 |
| 8q24.21 | 110 | 128192178 | 128201573 | *enhancer(2)* | 128572967 | 128579913 | 8.67E-07 |
| 8q24.21 | 110 | 128192178 | 128201573 | *enhancer(2)* | 128579914 | 128588131 | 3.86E-05 |
| 8q24.21 | 110 | 128192178 | 128201573 |  | 128630755 | 128637528 | 0.000124 |
| 8q24.21 | 110 | 128192178 | 128201573 |  | 128637659 | 128639743 | 0.000503 |
| 8q24.21 | 110 | 128192178 | 128201573 |  | 128662474 | 128666254 | 0.006312 |
| 8q24.21 | 110 | 128192178 | 128201573 | *MYC* | 128736779 | 128738569 | 0.009261 |
| 8q24.21 | 110 | 128192178 | 128201573 | *MYC* | 128738570 | 128740187 | 0.004404 |
| 8q24.21 | 110 | 128192178 | 128201573 | *MYC* | 128740188 | 128745990 | 0.001853 |
| 8q24.21 | 110 | 128192178 | 128201573 | *MYC* | 128745991 | 128756979 | 1.07E-05 |
| 8q24.21 | 110 | 128192178 | 128201573 |  | 128767054 | 128772659 | 0.006279 |
| 8q24.21 | 110 | 128192178 | 128201573 | *PVT1* | 128801732 | 128808278 | 1.09E-05 |
| 8q24.21 | 110 | 128192178 | 128201573 | *PVT1* | 128808279 | 128811894 | 0.009752 |
| 8q24.21 | 110 | 128192178 | 128201573 |  | 128988677 | 128990050 | 0.007245 |
| 8q24.21 | 110 | 128192178 | 128201573 |  | 129196191 | 129199755 | 0.00541 |
| 8q24.21 | 110 | 128192178 | 128201573 |  | 129278865 | 129281411 | 0.000605 |
| 8q24.21 | 111 | 128201574 | 128202614 |  | 129324805 | 129327116 | 0.009733 |
| 8q24.21 | 116 | 128226106 | 128226854 | *MYC* | 128745991 | 128756979 | 0.000851 |
| 8q24.21 | 116 | 128226106 | 128226854 | *CCDC26* | 130558006 | 130562996 | 0.003777 |
| 8q24.21 | 117 | 128226855 | 128233030 | *enhancer(2)* | 128565428 | 128568949 | 0.001047 |
| 8q24.21 | 117 | 128226855 | 128233030 | *enhancer(2)* | 128568986 | 128570345 | 0.001825 |
| 8q24.21 | 117 | 128226855 | 128233030 | *enhancer(2)* | 128572967 | 128579913 | 0.009096 |
| 8q24.21 | 117 | 128226855 | 128233030 | *enhancer(2)* | 128588677 | 128597037 | 0.003489 |
| 8q24.21 | 117 | 128226855 | 128233030 |  | 128639744 | 128643394 | 0.002489 |
| 8q24.21 | 117 | 128226855 | 128233030 | *PVT1* | 128808279 | 128811894 | 0.007245 |
| 8q24.21 | 117 | 128226855 | 128233030 | *CCDC26* | 130554560 | 130558005 | 0.004916 |
| 8q24.21 | 120 | 128236032 | 128241342 | *PVT1* | 128808279 | 128811894 | 0.006113 |
| 8q24.21 | 120 | 128236032 | 128241342 | *CCDC26* | 130558006 | 130562996 | 0.004779 |
| 8q24.21 | 120 | 128236032 | 128241342 | *CCDC26* | 130562997 | 130566850 | 1.11E-05 |
| 8q24.21 | 149 | 128312287 | 128313237 | *enhancer(2)* | 128561308 | 128564572 | 0.004868 |
| 8q24.21 | 149 | 128312287 | 128313237 | *enhancer(2)* | 128565428 | 128568949 | 0.000498 |
| 8q24.21 | 149 | 128312287 | 128313237 | *enhancer(2)* | 128568986 | 128570345 | 0.000288 |
| 8q24.21 | 149 | 128312287 | 128313237 | *enhancer(2)* | 128570346 | 128572043 | 0.001091 |
| 8q24.21 | 149 | 128312287 | 128313237 | *enhancer(2)* | 128572044 | 128572966 | 0.009642 |
| 8q24.21 | 149 | 128312287 | 128313237 | *enhancer(2)* | 128572967 | 128579913 | 1.18E-05 |
| 8q24.21 | 150 | 128313238 | 128313880 | *enhancer(1)* | 128510213 | 128513013 | 5.08E-05 |
| 8q24.21 | 150 | 128313238 | 128313880 | *enhancer(1)* | 128515836 | 128522323 | 0.008386 |
| 8q24.21 | 150 | 128313238 | 128313880 | *enhancer(2)* | 128561308 | 128564572 | 0.00173 |
| 8q24.21 | 150 | 128313238 | 128313880 | *enhancer(2)* | 128564573 | 128565427 | 0.003775 |
| 8q24.21 | 150 | 128313238 | 128313880 | *enhancer(2)* | 128565428 | 128568949 | 2.63E-06 |
| 8q24.21 | 150 | 128313238 | 128313880 | *enhancer(2)* | 128568986 | 128570345 | 1.33E-07 |
| 8q24.21 | 150 | 128313238 | 128313880 | *enhancer(2)* | 128570346 | 128572043 | 2.62E-06 |
| 8q24.21 | 150 | 128313238 | 128313880 | *enhancer(2)* | 128572044 | 128572966 | 0.00006 |
| 8q24.21 | 150 | 128313238 | 128313880 | *enhancer(2)* | 128572967 | 128579913 | 1.32E-06 |
| 8q24.21 | 150 | 128313238 | 128313880 | *enhancer(2)* | 128579914 | 128588131 | 2.61E-06 |
| 8q24.21 | 150 | 128313238 | 128313880 |  | 128637659 | 128639743 | 0.001006 |
| 8q24.21 | 150 | 128313238 | 128313880 | *MYC* | 128738570 | 128740187 | 0.006374 |
| 8q24.21 | 150 | 128313238 | 128313880 | *MYC* | 128745991 | 128756979 | 0.000548 |
| 8q24.21 | 150 | 128313238 | 128313880 | *PVT1* | 128808279 | 128811894 | 0.00085 |
| 8q24.21 | 150 | 128313238 | 128313880 |  | 129008184 | 129014092 | 0.009636 |
| 8q24.21 | 150 | 128313238 | 128313880 |  | 129278865 | 129281411 | 0.00109 |
| 8q24.21 | 150 | 128313238 | 128313880 | *CCDC26* | 130562997 | 130566850 | 0.002869 |
| 8q24.21 | 152 | 128314311 | 128319325 | *NSMCE2* | 126351704 | 126355582 | 0.00033 |
| 8q24.21 | 152 | 128314311 | 128319325 | *enhancer(1)* | 128505501 | 128508160 | 0.003512 |
| 8q24.21 | 152 | 128314311 | 128319325 | *enhancer(1)* | 128508161 | 128510212 | 3.27E-08 |
| 8q24.21 | 152 | 128314311 | 128319325 | *enhancer(1)* | 128510213 | 128513013 | 0.006327 |
| 8q24.21 | 152 | 128314311 | 128319325 |  | 128523913 | 128525513 | 0.00015 |
| 8q24.21 | 152 | 128314311 | 128319325 | *enhancer(2)* | 128557941 | 128561307 | 0.003519 |
| 8q24.21 | 152 | 128314311 | 128319325 | *enhancer(2)* | 128561308 | 128564572 | 2.50E-06 |
| 8q24.21 | 152 | 128314311 | 128319325 | *enhancer(2)* | 128564573 | 128565427 | 0.000292 |
| 8q24.21 | 152 | 128314311 | 128319325 | *enhancer(2)* | 128565428 | 128568949 | 9.86E-07 |
| 8q24.21 | 152 | 128314311 | 128319325 | *enhancer(2)* | 128568986 | 128570345 | 8.96E-09 |
| 8q24.21 | 152 | 128314311 | 128319325 | *enhancer(2)* | 128570346 | 128572043 | 1.98E-07 |
| 8q24.21 | 152 | 128314311 | 128319325 | *enhancer(2)* | 128572044 | 128572966 | 1.15E-08 |
| 8q24.21 | 152 | 128314311 | 128319325 | *enhancer(2)* | 128572967 | 128579913 | 1.84E-08 |
| 8q24.21 | 152 | 128314311 | 128319325 | *enhancer(2)* | 128579914 | 128588131 | 3.88E-07 |
| 8q24.21 | 152 | 128314311 | 128319325 | *enhancer(2)* | 128588677 | 128597037 | 0.007401 |
| 8q24.21 | 152 | 128314311 | 128319325 | *enhancer(2)* | 128597038 | 128604123 | 0.002773 |
| 8q24.21 | 152 | 128314311 | 128319325 |  | 128637659 | 128639743 | 1.04E-05 |
| 8q24.21 | 152 | 128314311 | 128319325 |  | 128639744 | 128643394 | 0.008562 |
| 8q24.21 | 152 | 128314311 | 128319325 |  | 128701082 | 128703885 | 0.004479 |
| 8q24.21 | 152 | 128314311 | 128319325 |  | 128731984 | 128736778 | 0.009667 |
| 8q24.21 | 152 | 128314311 | 128319325 | *MYC* | 128738570 | 128740187 | 0.000338 |
| 8q24.21 | 152 | 128314311 | 128319325 | *MYC* | 128740188 | 128745990 | 0.00033 |
| 8q24.21 | 152 | 128314311 | 128319325 | *MYC* | 128745991 | 128756979 | 3.98E-07 |
| 8q24.21 | 152 | 128314311 | 128319325 | *PVT1* | 128801732 | 128808278 | 6.63E-05 |
| 8q24.21 | 152 | 128314311 | 128319325 | *PVT1* | 128808279 | 128811894 | 0.000252 |
| 8q24.21 | 152 | 128314311 | 128319325 |  | 129000528 | 129003865 | 0.001014 |
| 8q24.21 | 152 | 128314311 | 128319325 |  | 129196191 | 129199755 | 0.003499 |
| 8q24.21 | 152 | 128314311 | 128319325 |  | 129252107 | 129256403 | 0.004496 |
| 8q24.21 | 152 | 128314311 | 128319325 | *CCDC26* | 130549445 | 130551891 | 0.000175 |
| 8q24.21 | 152 | 128314311 | 128319325 | *CCDC26* | 130558006 | 130562996 | 0.000247 |
| 8q24.21 | 152 | 128314311 | 128319325 | *CCDC26* | 130685507 | 130688608 | 0.002791 |
| 8q24.21 | 152 | 128314311 | 128319325 |  | 130977458 | 130981030 | 0.007479 |
| 8q24.21 | 154 | 128325588 | 128333496 | *PVT1* | 128808279 | 128811894 | 0.004733 |
| 8q24.21 | 160 | 128362560 | 128366580 | *enhancer(2)* | 128572967 | 128579913 | 0.009174 |
|  |  |  |  |  |  |  |  |
| *enhancer(1) and enhancer(2) denote two regions from 128,505,501-128,522,323 and 128,557,941-128,604,123 bps that co-localise with RAD21 binding sites and active histone marks in lymphoblastoid cells | | | | | | | |

**Supplementary Table 7: Statistically significant interaction peaks between bait fragments mapping within the 2q35 capture region**

| BT483 libraries | | | | | | | |
| --- | --- | --- | --- | --- | --- | --- | --- |
| Capture region | HindIII fragment 1 | Bait1_start | Bait1_end | HindIII fragment 2 | Bait2_start | Bait2_end | PFDR |
| 2q35 | 3 | 217621942 | 217623592 | 82 | 217912886 | 217925467 | 0.003186 |
| 2q35 | 3 | 217621942 | 217623592 | 124 | 218027482 | 218030973 | 0.008299 |
| 2q35 | 16 | 217661556 | 217668141 | 61 | 217831576 | 217840772 | 0.008211 |
| 2q35 | 19 | 217671758 | 217678338 | 22 | 217680927 | 217713110 | 0.001246 |
| 2q35 | 103 | 217969511 | 217970817 | 125 | 218030974 | 218036250 | 0.003119 |
| 2q35 | 117 | 218012663 | 218015576 | 187 | 218230849 | 218232200 | 0.006961 |
| 2q35 | 124 | 218027482 | 218030973 | 181 | 218222908 | 218223871 | 0.007041 |
| 2q35 | 124 | 218027482 | 218030973 | 197 | 218252928 | 218253864 | 0.007755 |
| 2q35 | 125 | 218030974 | 218036250 | 195 | 218250629 | 218252882 | 0.008262 |
| 2q35 | 125 | 218030974 | 218036250 | 197 | 218252928 | 218253864 | 0.000051 |
| 2q35 | 126 | 218036251 | 218037085 | 195 | 218250629 | 218252882 | 0.004011 |
| 2q35 | 135 | 218052434 | 218059254 | 195 | 218250629 | 218252882 | 0.004881 |
| 2q35 | 138 | 218062015 | 218072524 | 151 | 218111613 | 218115046 | 0.00326 |
| 2q35 | 142 | 218079347 | 218083663 | 187 | 218230849 | 218232200 | 0.001269 |
| 2q35 | 143 | 218083664 | 218087853 | 187 | 218230849 | 218232200 | 0.003617 |
| 2q35 | 151 | 218111613 | 218115046 | 162 | 218154772 | 218157253 | 0.001274 |
| 2q35 | 151 | 218111613 | 218115046 | 187 | 218230849 | 218232200 | 0.000275 |
| 2q35 | 151 | 218111613 | 218115046 | 195 | 218250629 | 218252882 | 0.001254 |
| 2q35 | 151 | 218111613 | 218115046 | 197 | 218252928 | 218253864 | 0.003217 |
| 2q35 | 151 | 218111613 | 218115046 | 200 | 218254339 | 218261778 | 0.00123 |
| 2q35 | 161 | 218154600 | 218154771 | 187 | 218230849 | 218232200 | 0.002515 |
| 2q35 | 162 | 218154772 | 218157253 | 187 | 218230849 | 218232200 | 0.001362 |
| 2q35 | 162 | 218154772 | 218157253 | 195 | 218250629 | 218252882 | 0.00416 |
| 2q35 | 163 | 218157254 | 218159099 | 187 | 218230849 | 218232200 | 0.002263 |
| 2q35 | 163 | 218157254 | 218159099 | 195 | 218250629 | 218252882 | 0.001634 |
| 2q35 | 164 | 218159100 | 218159343 | 187 | 218230849 | 218232200 | 0.008362 |
| 2q35 | 181 | 218222908 | 218223871 | 195 | 218250629 | 218252882 | 0.001149 |
| 2q35 | 187 | 218230849 | 218232200 | 195 | 218250629 | 218252882 | 2.90E-06 |
| 2q35 | 187 | 218230849 | 218232200 | 196 | 218252883 | 218252927 | 0.004944 |
| 2q35 | 187 | 218230849 | 218232200 | 197 | 218252928 | 218253864 | 2.20E-06 |
| 2q35 | 187 | 218230849 | 218232200 | 200 | 218254339 | 218261778 | 0.001274 |
| 2q35 | 187 | 218230849 | 218232200 | 224 | 218353009 | 218355732 | 0.008548 |
| 2q35 | 195 | 218250629 | 218252882 | 225 | 218355733 | 218357138 | 0.005189 |
| SUM44 libraries | | | | | | | |
| 2q35 | 10 | 217640472 | 217640852 | 101 | 217966312 | 217968899 | 0.003082 |
| 2q35 | 10 | 217640472 | 217640852 | 116 | 218008781 | 218012662 | 0.002007 |
| 2q35 | 11 | 217640853 | 217652316 | 99 | 217955320 | 217959806 | 0.002742 |
| 2q35 | 152 | 218115047 | 218115521 | 171 | 218173938 | 218182158 | 0.009598 |
| 2q35 | 186 | 218229242 | 218230848 | 197 | 218252928 | 218253864 | 0.009215 |
| 2q35 | 187 | 218230849 | 218232200 | 195 | 218250629 | 218252882 | 0.003078 |
| 2q35 | 187 | 218230849 | 218232200 | 200 | 218254339 | 218261778 | 0.003043 |
| GM06990 libraries | | | | | | | |
| 2q35 | 143 | 218083664 | 218087853 | 151 | 218111613 | 218115046 | 5.63E-03 |
| 2q35 | 143 | 218083664 | 218087853 | 205 | 218284712 | 218286775 | 0.004652 |

**Supplementary Table 8: Statistically significant interaction peaks between bait fragments mapping within the 8q24.21 capture region**

| GM06990 libraries | | | | | | | |
| --- | --- | --- | --- | --- | --- | --- | --- |
| Capture region | HindIII fragment 1 | Bait1_start | Bait1_end | HindIII fragment 2 | Bait2_start | Bait2_end | PFDR |
| 8 | 1 | 127886760 | 127889453 | 101 | 128171973 | 128182972 | 0.00019 |
| 8 | 1 | 127886760 | 127889453 | 102 | 128182973 | 128186396 | 0.000206 |
| 8 | 1 | 127886760 | 127889453 | 109 | 128189518 | 128192177 | 0.000036 |
| 8 | 1 | 127886760 | 127889453 | 110 | 128192178 | 128201573 | 0.000707 |
| 8 | 1 | 127886760 | 127889453 | 120 | 128236032 | 128241342 | 0.001777 |
| 8 | 1 | 127886760 | 127889453 | 152 | 128314311 | 128319325 | 0.000119 |
| 8 | 2 | 127889454 | 127891696 | 101 | 128171973 | 128182972 | 0.001838 |
| 8 | 2 | 127889454 | 127891696 | 102 | 128182973 | 128186396 | 0.008606 |
| 8 | 4 | 127895195 | 127897477 | 152 | 128314311 | 128319325 | 0.004746 |
| 8 | 101 | 128171973 | 128182972 | 150 | 128313238 | 128313880 | 0.007472 |
| 8 | 102 | 128182973 | 128186396 | 152 | 128314311 | 128319325 | 0.003859 |
| 8 | 109 | 128189518 | 128192177 | 117 | 128226855 | 128233030 | 0.005802 |
| 8 | 109 | 128189518 | 128192177 | 149 | 128312287 | 128313237 | 0.00016 |
| 8 | 109 | 128189518 | 128192177 | 150 | 128313238 | 128313880 | 8.00E-07 |
| 8 | 109 | 128189518 | 128192177 | 152 | 128314311 | 128319325 | 3.10E-08 |
| 8 | 110 | 128192178 | 128201573 | 123 | 128246229 | 128252150 | 0.005804 |
| 8 | 110 | 128192178 | 128201573 | 141 | 128293253 | 128302001 | 0.0072 |
| 8 | 110 | 128192178 | 128201573 | 142 | 128302002 | 128303884 | 0.000581 |
| 8 | 110 | 128192178 | 128201573 | 149 | 128312287 | 128313237 | 2.80E-08 |
| 8 | 110 | 128192178 | 128201573 | 150 | 128313238 | 128313880 | 1.40E-08 |
| 8 | 110 | 128192178 | 128201573 | 152 | 128314311 | 128319325 | 3.40E-08 |
| 8 | 111 | 128201574 | 128202614 | 150 | 128313238 | 128313880 | 0.001889 |
| 8 | 111 | 128201574 | 128202614 | 152 | 128314311 | 128319325 | 0.00103 |
| 8 | 114 | 128207031 | 128207868 | 150 | 128313238 | 128313880 | 0.000029 |
| 8 | 114 | 128207031 | 128207868 | 152 | 128314311 | 128319325 | 0.001756 |
| 8 | 116 | 128226106 | 128226854 | 149 | 128312287 | 128313237 | 0.000102 |
| 8 | 116 | 128226106 | 128226854 | 150 | 128313238 | 128313880 | 4.50E-06 |
| 8 | 116 | 128226106 | 128226854 | 152 | 128314311 | 128319325 | 2.80E-08 |
| 8 | 117 | 128226855 | 128233030 | 142 | 128302002 | 128303884 | 0.004269 |
| 8 | 117 | 128226855 | 128233030 | 149 | 128312287 | 128313237 | 9.40E-05 |
| 8 | 117 | 128226855 | 128233030 | 150 | 128313238 | 128313880 | 7.10E-06 |
| 8 | 117 | 128226855 | 128233030 | 152 | 128314311 | 128319325 | 5.00E-06 |
| 8 | 118 | 128233031 | 128235179 | 149 | 128312287 | 128313237 | 0.000075 |
| 8 | 118 | 128233031 | 128235179 | 150 | 128313238 | 128313880 | 0.003913 |
| 8 | 118 | 128233031 | 128235179 | 152 | 128314311 | 128319325 | 0.00173 |
| 8 | 120 | 128236032 | 128241342 | 142 | 128302002 | 128303884 | 0.002041 |
| 8 | 120 | 128236032 | 128241342 | 149 | 128312287 | 128313237 | 0.000179 |
| 8 | 120 | 128236032 | 128241342 | 150 | 128313238 | 128313880 | 0.004604 |
| 8 | 120 | 128236032 | 128241342 | 152 | 128314311 | 128319325 | 0.000174 |
| 8 | 121 | 128241343 | 128243613 | 142 | 128302002 | 128303884 | 0.009423 |
| 8 | 121 | 128241343 | 128243613 | 149 | 128312287 | 128313237 | 0.002762 |
| 8 | 121 | 128241343 | 128243613 | 150 | 128313238 | 128313880 | 0.000428 |
| 8 | 121 | 128241343 | 128243613 | 152 | 128314311 | 128319325 | 0.008661 |
| 8 | 122 | 128243614 | 128246228 | 149 | 128312287 | 128313237 | 0.003819 |
| 8 | 123 | 128246229 | 128252150 | 150 | 128313238 | 128313880 | 0.000713 |
| 8 | 123 | 128246229 | 128252150 | 152 | 128314311 | 128319325 | 0.001882 |
| 8 | 125 | 128256931 | 128263234 | 152 | 128314311 | 128319325 | 0.00253 |
| 8 | 127 | 128263616 | 128270199 | 149 | 128312287 | 128313237 | 4.30E-03 |
| 8 | 127 | 128263616 | 128270199 | 150 | 128313238 | 128313880 | 0.00678 |
| 8 | 127 | 128263616 | 128270199 | 152 | 128314311 | 128319325 | 0.004506 |
| 8 | 140 | 128288840 | 128293252 | 150 | 128313238 | 128313880 | 0.007511 |
| 8 | 152 | 128314311 | 128319325 | 189 | 128456225 | 128462760 | 0.005759 |

**Supplementary Table 9: The location of regions of amplification or gain in BT483 and SUM44 cells**

|  |  |  | |  |
| --- | --- | --- | --- | --- |
| BT483 cells |  |  | |  |
| Amplifications (> 4 copies) | | | | |
| Chromosome | Cytobands | Amplification | | Length MB |
|  |  | Start (bps) | End (bps) |  |
| 1 | p13.3 | 110628929 | 111452878 | 0.82 |
| 1 | q21.1-q21.2 | 146870681 | 147404865 | 0.53 |
| 1 | q21.3 | 151593346 | 153382015 | 1.79 |
| 1 | q21.3-q22 | 154414666 | 155291617 | 0.88 |
| 1 | q23.1 | 156764312 | 157826773 | 1.06 |
| 1 | q23.3-q24.1 | 161428929 | 165664938 | 4.24 |
| 1 | q24.1-q24.2 | 166731364 | 167237395 | 0.51 |
| 1 | q24.2-q31.2 | 168272744 | 190866945 | 22.59 |
| 1 | q31.2-q32.1 | 191100172 | 199838194 | 8.74 |
| 1 | q32.1-q32.2 | 206666980 | 210020597 | 3.35 |
| 1 | q32.3-q42.3 | 213379796 | 234856514 | 21.48 |
| 8 | p11.23 | 36862453 | 38068892 | 1.21 |
| 8 | p11.22-p11.21 | 38933767 | 41364865 | 2.43 |
| 8 | q12.1-q22.1 | 57508558 | 95533574 | 38.03 |
| 8 | q22.1-q24.3 | 96044671 | 144230110 | 48.19 |
| 14 | q32.13-q32.2 | 96130739 | 98881016 | 2.75 |
| 22 | q11.22-q11.23 | 23071750 | 23511211 | 0.44 |
| Gains (3-4 copies) | | | | |
| 1 | p13.3-p13.2 | 111448458 | 112174856 | 0.73 |
| 1 | p12-q21.1 | 120449470 | 146889771 | 26.44 |
| 1 | q21.2-q21.3 | 147426088 | 151570199 | 4.14 |
| 1 | q21.3 | 153406844 | 154422159 | 1.02 |
| 1 | q22-q23.1 | 155237093 | 156851480 | 1.61 |
| 1 | q23.1-q23.3 | 157689617 | 161407301 | 3.72 |
| 1 | q24.1 | 165583520 | 166776273 | 1.19 |
| 1 | q24.2 | 167217841 | 168352062 | 1.13 |
| 1 | q32.1 | 199774847 | 206769473 | 6.99 |
| 1 | q32.2-q32.3 | 210031526 | 213563411 | 3.53 |
| 1 | q42.3-q44 | 234765252 | 248876423 | 14.11 |
| 2 | q12.1 | 104454436 | 105031293 | 0.58 |
| 2 | q13-q14.1 | 114252945 | 114544948 | 0.29 |
| 3 | q11.1-q21.2 | 90006470 | 125445425 | 35.44 |
| 3 | q22.1-q22.2 | 129940983 | 134358544 | 4.42 |
| 3 | q24-q26.33 | 143092411 | 182678925 | 39.59 |
| 3 | q28-q29 | 188052322 | 194068355 | 6.02 |
| 4 | q23-q26 | 100310966 | 118585728 | 18.27 |
| 5 | p15.2-p15.1 | 11827059 | 16492950 | 4.67 |
| 5 | p15.1-p13.3 | 17646891 | 31770914 | 14.12 |
| 5 | p13.3-q13.2 | 32135992 | 68472549 | 36.34 |
| 5 | q13.2 | 70798113 | 72300457 | 1.50 |
| 5 | q14.2-q23.3 | 82217362 | 130170791 | 47.95 |
| 5 | q31.1 | 132063033 | 133195314 | 1.13 |
| 5 | q31.1-q31.2 | 134542031 | 136631802 | 2.09 |
| 5 | q31.3-q32 | 142523270 | 148779464 | 6.26 |
| 6 | p22.3-p22.2 | 16026913 | 26437519 | 10.41 |
| 6 | p21.33-p21.32 | 31875342 | 33205015 | 1.33 |
| 6 | p21.2 | 39228601 | 39784781 | 0.56 |
| 6 | p21.1-p12.1 | 45121990 | 56796333 | 11.67 |
| 7 | p22.3-p22.2 | 10239 | 4318194 | 4.31 |
| 7 | p22.1-p14.2 | 7263574 | 35985290 | 28.72 |
| 7 | p14.1-p13 | 37824720 | 43943811 | 6.12 |
| 7 | p13-p11.2 | 45170406 | 55702142 | 10.53 |
| 7 | q11.21 | 63623778 | 65226821 | 1.60 |
| 7 | q11.22 | 69129615 | 69933571 | 0.80 |
| 7 | q11.23-q21.3 | 76949194 | 97647029 | 20.70 |
| 7 | q22.1-q36.1 | 102688755 | 151952792 | 49.26 |
| 7 | q36.2-q36.3 | 152630716 | 159124355 | 6.49 |
| 8 | p11.23-p11.22 | 38028859 | 39021912 | 0.99 |
| 8 | p11.21-q12.1 | 41345716 | 57644642 | 16.30 |
| 8 | q22.1 | 95541933 | 96024074 | 0.48 |
| 8 | q24.3 | 144087076 | 146236289 | 2.15 |
| 9 | q21.13 | 75767558 | 77146016 | 1.38 |
| 9 | q21.32 | 84829295 | 86196198 | 1.37 |
| 10 | p15.3-p15.1 | 61001 | 5382542 | 5.32 |
| 10 | p15.1-p12.31 | 6401070 | 21412150 | 15.01 |
| 10 | p12.31-p12.1 | 22116522 | 25754506 | 3.64 |
| 10 | q11.23-q21.1 | 52642291 | 60332122 | 7.69 |
| 11 | p14.1 | 28137384 | 29463648 | 1.33 |
| 12 | p13.33-p13.31 | 147333 | 7613222 | 7.47 |
| 12 | p13.31-p11.1 | 8814249 | 34051780 | 25.24 |
| 12 | q12-q13.11 | 38614878 | 48867224 | 10.25 |
| 12 | q13.13-q24.33 | 52518692 | 133778461 | 81.26 |
| 13 | q13.1-q14.11 | 33317293 | 45027080 | 11.71 |
| 13 | q14.2-q31.1 | 50564376 | 86617644 | 36.05 |
| 14 | q11.2-q23.1 | 20501991 | 60148820 | 39.65 |
| 14 | q23.1-q24.1 | 60408514 | 68106455 | 7.70 |
| 14 | q31.1 | 80535709 | 81705393 | 1.17 |
| 14 | q31.3 | 89144006 | 89733490 | 0.59 |
| 14 | q32.13 | 94815819 | 95661482 | 0.85 |
| 14 | q32.2-q32.31 | 99341354 | 101728834 | 2.39 |
| 14 | q32.33 | 105482598 | 107246329 | 1.76 |
| 15 | q11.2 | 20828305 | 22596193 | 1.77 |
| 16 | q22.2 | 70819433 | 71315829 | 0.50 |
| 17 | q11.2-q12 | 31312257 | 33422088 | 2.11 |
| 17 | q21.33-q22 | 47806831 | 54842774 | 7.04 |
| 17 | q24.3 | 68043992 | 70219540 | 2.18 |
| 20 | p13-p11.21 | 90210 | 25097218 | 25.01 |
| 20 | p11.1-q11.23 | 25870544 | 35381859 | 9.51 |
| 20 | q11.23-q13.33 | 35881974 | 62964520 | 27.08 |
| 22 | q11.21 | 18065061 | 18964431 | 0.90 |
| 22 | q11.21-q11.22 | 19694140 | 23114636 | 3.42 |
| 22 | q11.22-q11.23 | 23404737 | 24172637 | 0.77 |
| 22 | q13.33 | 49431763 | 51186519 | 1.75 |
| SUM44 cells  Amplifications (>4 copies) | | | | |
| 1 | p22.1-p21.3 | 93720946 | 98288064 | 4.57 |
| 1 | p21.2-p21.1 | 100787832 | 105613102 | 4.83 |
| 2 | p25.1 | 8951324 | 9650758 | 0.70 |
| 2 | p24.3-p23.2 | 14798627 | 28363399 | 13.56 |
| 5 | p15.33 | 1561279 | 1848815 | 0.29 |
| 8 | p12-p11.21 | 35691168 | 41855494 | 6.16 |
| 9 | q33.3 | 129041210 | 130241519 | 1.20 |
| 11 | p11.11-q11 | 54956502 | 56749469 | 1.79 |
| 11 | q13.2-q13.4 | 66612678 | 71258469 | 4.65 |
| 11 | q13.4-q14.1 | 72877184 | 80862786 | 7.99 |
| 16 | q12.2 | 53156165 | 56212865 | 3.06 |
| Gains (3-4 copies) | | | | |
| 1 | p36.33-p36.12 | 11754 | 21450716 | 21.44 |
| 1 | p21.3-p21.2 | 98257272 | 100747239 | 2.49 |
| 1 | p21.1-p12 | 105504286 | 120529415 | 15.03 |
| 1 | q21.2-q22 | 150389388 | 155540499 | 5.15 |
| 1 | q23.2-q31.1 | 159500529 | 189984679 | 30.48 |
| 1 | q31.2-q43 | 191261992 | 243135852 | 51.87 |
| 1 | q43-q44 | 243333738 | 248876423 | 5.54 |
| 2 | q36.1 | 222125564 | 223633785 | 1.51 |
| 2 | q36.2-q36.3 | 225287976 | 228583725 | 3.30 |
| 4 | p16.3 | 24423 | 3415498 | 3.39 |
| 4 | p14 | 38594738 | 40502807 | 1.91 |
| 4 | q13.2-q13.3 | 69592849 | 70985219 | 1.39 |
| 4 | q31.21 | 143139257 | 144308555 | 1.17 |
| 5 | p15.33 | 18263 | 1508881 | 1.49 |
| 5 | p15.31-q23.1 | 9509254 | 115411163 | 105.90 |
| 5 | q23.1-q33.3 | 116097067 | 157415787 | 41.32 |
| 6 | p25.3-p25.1 | 129242 | 5491065 | 5.36 |
| 6 | p25.1-p24.3 | 5830110 | 7135403 | 1.31 |
| 6 | p24.3-p21.2 | 8093168 | 38900761 | 30.81 |
| 6 | p21.1-p11.2 | 42373615 | 57435033 | 15.06 |
| 6 | p11.2-q16.1 | 58329791 | 93669801 | 35.34 |
| 6 | q16.1-q16.3 | 95536765 | 101801848 | 6.27 |
| 6 | q16.3-q24.1 | 103139733 | 142304417 | 39.16 |
| 6 | q25.3 | 157148082 | 160811962 | 3.66 |
| 6 | q26-q27 | 161082899 | 171008924 | 9.93 |
| 7 | p22.3-p12.1 | 772210 | 50823472 | 50.05 |
| 7 | q11.21-q33 | 64571369 | 134530971 | 69.96 |
| 7 | q36.3 | 157614279 | 159124355 | 1.51 |
| 8 | p22 | 13488315 | 14669054 | 1.18 |
| 8 | q11.23-q21.2 | 53383185 | 86528860 | 33.15 |
| 8 | q21.2-q23.2 | 86571261 | 111792088 | 25.22 |
| 8 | q23.3-q24.3 | 112983787 | 146236289 | 33.25 |
| 9 | q33.3-q34.11 | 130112020 | 130504357 | 0.39 |
| 10 | p15.3-q11.22 | 61001 | 46330071 | 46.27 |
| 10 | q11.23-q22.2 | 51372074 | 77519746 | 26.15 |
| 10 | q22.3-q23.33 | 80732030 | 96841626 | 16.11 |
| 11 | p15.5-p11.2 | 61992 | 49036699 | 48.97 |
| 11 | q13.4 | 72299402 | 72895114 | 0.60 |
| 12 | p13.33 | 147333 | 2206260 | 2.06 |
| 12 | p13.31 | 5878035 | 8268560 | 2.39 |
| 12 | p13.31-p11.1 | 8624988 | 34190633 | 25.57 |
| 12 | q11-q24.32 | 38016955 | 128105896 | 90.09 |
| 12 | q24.33 | 131847814 | 133778461 | 1.93 |
| 14 | q11.2-q21.1 | 19968167 | 38315036 | 18.35 |
| 14 | q32.2 | 99567526 | 100917753 | 1.35 |
| 14 | q32.31-q32.33 | 101892273 | 107246329 | 5.35 |
| 15 | q11.2 | 20013225 | 24151092 | 4.14 |
| 15 | q13.1-q26.3 | 29789334 | 102490914 | 72.70 |
| 16 | p13.3-p11.2 | 61002 | 29028183 | 28.97 |
| 16 | p11.2 | 29731873 | 31984135 | 2.25 |
| 16 | p11.1-q12.2 | 33824026 | 53284032 | 19.46 |
| 20 | p13-p11.21 | 90210 | 25286374 | 25.20 |
| 20 | q11.21 | 29834448 | 30472842 | 0.64 |
| 20 | q11.21-q13.33 | 30705569 | 62964520 | 32.26 |
| 22 | q11.23-q12.1 | 25898246 | 26232566 | 0.33 |
| 22 | q12.3-q13.31 | 37362644 | 47433518 | 10.07 |
| 22 | q13.33 | 50053636 | 51186519 | 1.13 |
| 23 | p22.33 | 629113 | 2862864 | 2.23 |
| 23 | p22.2-p11.4 | 10325859 | 37638740 | 27.31 |
| 23 | p11.22-q23 | 52678304 | 115000552 | 62.32 |
| 24 | p11.2-q12 | 2706160 | 28818361 | 26.11 |

**Supplementary Table 10: Statistically significant trans interaction peaks**

| Bait chromosome | bin number | Target chromosome | Target start | Target end | PFDR | Features |
| --- | --- | --- | --- | --- | --- | --- |
| BT483 cells |  |  |  |  |  |  |
| 2 | 2 | 1 | 225750001 | 225800000 | 1.3 x 10-7 | *ENAH* |
| 3 | 3, 5, 7 | 6 | 57450001 | 57500000 | 0.0009-1.3 x 10-5 | *PRIM2* |
| 8 | 4 | 1 | 145000001 | 145050000 | 0.008 | *PDE4DIP; RP11-326G21.1* |
| 8 | 13 | 16 | 83250001 | 83300000 | 4.9 x 10-5 | *CDH13* |
| 16 | 4 | 1 | 142800001 | 142850000 | 0.005 | *RP11-42302.5* |
| 16 | 11 | 2 | 84650001 | 84700000 | 7 x 10-6 | *SUCLG1* |
| 16 | multiple | 2 | 133000001 | 133050000 | 0.006-4.4 x 10-5 | *ANKRD30BL; RNA5-8SP5; miR663B; ACO97532.2* |
| 16 | 5 | 4 | 190550001 | 190600000 | 0.002 | *RP11-462G22.1* |
| 16 | 5 | 9 | 68400001 | 68450000 | 0.0004 | *RP11-764K9.1; RNA5SP284; miR4477B* |
| 16 | 1 | 18 | 28700001 | 28750000 | 0.01 | *DSC1; RP11-408H20.2* |
| 18 | 4 | 2 | 20100001 | 20150000 | 0.001 | *TTC32; WDR35; RP11-7908.1* |
| SUM44 cells |  |  |  |  |  |  |
| 2 | 2 | 1 | 225750001 | 225800000 | 0.001 | *ENAH* |
| 2 | 13 | 1 | 234850001 | 234900000 | 0.008 | *RP4-781K5.7; RP4-781K5.8* |
| 2 | 13 | 3 | 14850001 | 14900000 | 0.009 | *FGD5; RP-11-95M5.1* |
| 2 | 13 | 3 | 43250001 | 43300000 | 0.009 | *AC104434.1* |
| 2 | 7, 10 | 3 | 46000001 | 46050000 | 0.006-0.0009 | *FYCO1* |
| 2 | 13 | 3 | 46400001 | 46450000 | 0.009 | *CCR2; CCR5* |
| 2 | 14 | 3 | 58000001 | 58050000 | 0.002 | *FLNB* |
| 2 | 7, 13 | 3 | 72100001 | 72200000 | 0.006-0.001 | *linc00877; RP11-398A8.4* |
| 2 | multiple | 7 | 142100001 | 142150000 | 0.007-2.7 x 10-5 | *TRVB* |
| 2 | 13 | 7 | 142900001 | 142950000 | 0.004 | *TAS2R40; AC073342.1* |
| 2 | 4 | 7 | 148500001 | 148550000 | 0.006 | *EZH2; RNU20P* |
| 2 | multiple | 7 | 151000001 | 151350000 | 0.009-0.0004 | *NUB1; WDR86; CRYGN; RHEB; PRKAG2* |
| 2 | multiple | 7 | 151750001 | 151800000 | 0.006-0.0004 | *GLANT11* |
| 8 | 5,7,8 | 16 | 32500001 | 32550000 | 0.008-0.004 | No feature |
| 18 | 9 | 5 | 4500001 | 4550000 | 0.009 | *RP11-44503.2* |
| 18 | 13 | 5 | 15500001 | 15550000 | 0.001 | *FBXL7* |
| 18 | 12 | 5 | 16350001 | 16400000 | 0.006 | *RP1-167G20.1* |
| 18 | 9 | 5 | 45950001 | 46000000 | 0.005 | No feature |
| 18 | 9 | 20 | 29900001 | 29950000 | 0.002 | *RNA5SP480* |
| 18 | 2 | 20 | 40150001 | 40200000 | 0.008 | *CHD6* |

**Supplementary Table 11: eQTL analysis of rs6721996, rs471467 and rs418269 and levels of expression of putative target genes based on 437 ER-positive tumors from TCGA**

| SNP  (proxy) | SNP (published) | Chromosome | Target | t-stat | P value | FDR |
| --- | --- | --- | --- | --- | --- | --- |
| rs6721996 | rs13387042 | 2q35 | *DIRC3* | 2.22 | 0.03 | 0.08 |
| rs6721996 | rs13387042 | 2q35 | *IGFBP5* | 2.07 | 0.04 | 0.08 |
| rs471467 | rs865686 | 9q31.2 | *KLF4* | -0.25 | 0.81 | 0.82 |
| rs418269 | rs13281615 | 8q24.21 | *MYC* | 0.23 | 0.82 | 0.82 |

**Supplementary Table 12: The location and correlation (r2 and D’) of 2 SNPs that map to interaction peaks and are correlated with rs865686**

| Chromosome | SNP | Position | Capture fragment | r2 | D' |
| --- | --- | --- | --- | --- | --- |
| 9 | rs1323397 | 111034788 | 74 | 0.12 | 0.70 |
| 9 | rs9299149 | 111034825 | 74 | 0.22 | 0.48 |

**Supplementary Table 13: The location and correlation (r2 and D’) of 4 SNPs that map to interaction peaks and are correlated with rs13281615**

| Chromosome | SNP | Position | Capture fragment | r2 | D' |
| --- | --- | --- | --- | --- | --- |
| 8 | rs10105114 | 127889918 | 2 | 0.13 | 0.48 |
| 8 | rs10956340 | 127891479 | 2 | 0.13 | 0.48 |
| 8 | rs13251554 | 127889084 | 1 | 0.14 | 0.49 |
| 8 | rs938644 | 127888336 | 1 | 0.11 | 0.45 |

**Supplementary Table 14: The location and correlation (r2 and D’) of 33 SNPs that map to interaction peaks and are correlated with rs13387042**

| Chromosome | SNP | Position | Capture fragment | r2 | D' |
| --- | --- | --- | --- | --- | --- |
| 2 | rs2372945 | 217914112 | 82 | 0.31 | 0.86 |
| 2 | rs35780967 | 217914762 | 82 | 0.36 | 1.00 |
| 2 | rs12694403 | 217915414 | 82 | 0.44 | 1.00 |
| 2 | rs12613955 | 217916052 | 82 | 0.81 | 1.00 |
| 2 | rs11894340 | 217917167 | 82 | 0.27 | 0.79 |
| 2 | rs59562447 | 217917222 | 82 | 0.33 | 1.00 |
| 2 | rs7600412 | 217918571 | 82 | 0.34 | 0.93 |
| 2 | rs10183545 | 217918751 | 82 | 0.27 | 0.79 |
| 2 | rs17778299 | 217919565 | 82 | 0.21 | 1.00 |
| 2 | rs17778329 | 217919811 | 82 | 0.33 | 1.00 |
| 2 | rs4442975 | 217920769 | 82 | 0.97 | 1.00 |
| 2 | rs10932693 | 217921121 | 82 | 0.33 | 1.00 |
| 2 | rs17778427 | 217923013 | 82 | 0.33 | 1.00 |
| 2 | rs17835044 | 217923605 | 82 | 0.33 | 1.00 |
| 2 | rs7588345 | 217923816 | 82 | 0.21 | 1.00 |
| 2 | rs7562029 | 217924261 | 82 | 0.33 | 1.00 |
| 2 | rs13000023 | 217924394 | 82 | 0.36 | 1.00 |
| 2 | rs735361 | 217925123 | 82 | 0.33 | 1.00 |
| 2 | rs16856873 | 217927278 | 84 | 0.28 | 0.83 |
| 2 | rs17778798 | 217927421 | 84 | 0.28 | 0.83 |
| 2 | rs16856877 | 217927499 | 84 | 0.13 | 0.80 |
| 2 | rs7600279 | 217927600 | 84 | 0.19 | 1.00 |
| 2 | rs12151670 | 218237437 | 190 | 0.12 | 0.41 |
| 2 | rs12620884 | 218238881 | 190 | 0.12 | 0.41 |
| 2 | rs899279 | 218262565 | 201 | 0.11 | 1.00 |
| 2 | rs3953450 | 218262889 | 201 | 0.11 | 1.00 |
| 2 | rs1478574 | 218265439 | 201 | 0.11 | 1.00 |
| 2 | rs12989997 | 218266356 | 201 | 0.12 | 0.53 |
| 2 | rs1476227 | 218266704 | 201 | 0.15 | 1.00 |
| 2 | rs55806820 | 218266745 | 201 | 0.12 | 0.53 |
| 2 | rs4674162 | 218266794 | 201 | 0.11 | 1.00 |
| 2 | rs16857490 | 218267260 | 201 | 0.11 | 1.00 |
| 2 | rs1351162 | 218267899 | 201 | 0.11 | 1.00 |

**Supplementary Table 15: Genotype data for rs13387042 (2q35), rs13281615 (8q24.21) and rs865686 (9q32.1) in SUM44, BT483, MCF7 and GM06990 cells**

|  | rs13387042 (2q35) | rs13281615 (8q24.21) | rs865686 (9q32.1) |
| --- | --- | --- | --- |
| SUM44 | A/A | A/G | G/G |
| BT483 | A/A | A/A | T/T |
| MCF7 | A/A | A/A | T/T |
| GM06990 | G/G | A/A | T/T |

**Supplementary Table 16: BAC libraries used for 3C validation of Capture Hi-C interaction peaks**

| clone name  2q35 | Location (hg19) |
| --- | --- |
| RP11-307A11 | Chr2:217355771-217515779 |
| RP11-506C8 | Chr2:217515780-217695438 |
| RP11-53G8 | Chr2:217695439-217797620 |
| RP11-574016 | Chr2:217797621-217989264 |
| RP11-395A12 | Chr2:217989265-218089381 |
| RP11-423F9 | Chr2:218089382-218301730 |
| RP11-295A19 | Chr2:218301731-218485572 |
| RP11-370K6 | Chr2:218485573-218642359 |
| 8q24.21 |  |
| RP11-351C8 | Chr8:127730275-127888736 |
| RP11-645E10 | Chr8:127888737-128049136 |
| RP11-255B23 | Chr8:128049137-128222732 |
| RP11-414A9 | Chr8:128222733-128248315 |
| RP11-382A18 | Chr8:128248316-128421245 |
| RP11-327N12 | Chr8:128421246-128508281 |
| RP11-367L7 | Chr8:128508282-128625278 |
| RP11-1136L8 | Chr8:128625279-128714948 |
| RP11-440N18 | Chr8:128596756-128777986 |
| RP11-125A17 | Chr8:128865418-129036660 |
| RP11-55J15 | Chr8:128929003-129064398 |
| RP11-263C20 | Chr8:129064399-129154372 |
| RP11-709E21 | Chr8:129154373-129250700 |
| RP11-234A3 | Chr8:129409417-129558508 |
| RP11-460A11 | Chr8:129715773-129817851 |
| RP11-126N1 | Chr8:129817852-129937986 |
| RP11-1057N3 | Chr8:130116620-130311276 |
| RP11-26E5 | Chr8:130389143-130502797 |
| RP11-17E16 | Chr8:130502798-130508884 |
| RP11-259L23 | Chr8:130508885-130676440 |
| 9q31.2 |  |
| RP11-417L14 | Chr9:109891085-110001115 |
| RP11-131A5 | Chr9:110001116-110163524 |
| RP11-363D24 | Chr9:110163525-110247994 |
| RP11-150J11 | Chr9:110247995-110279706 |
| RP11-438P9 | Chr9:110279707-110477307 |
| RP11-380I20 | Chr9:110477308-110632324 |
| RP11-272G11 | Chr9:110632325-110739717 |
| RP11-240E2 | Chr9:110739718-110871875 |
| RP11-505C13 | Chr9:110871876-111027532 |
| RP11-143P10 | Chr9:111027533-111207074 |
| RP11-400A24 | Chr9:111207075-111388616 |

**Supplementary Table 17: PCR primers used for 3C validation of Capture Hi-C interaction peaks**

| Primer Location (GRCh37) | Primer Sequence |
| --- | --- |
| Chr2:218261726-218261748 | AATCCACCAGGAAATACCCCACT |
| Chr2:217504171-217504193 | GAATGAAGGAGGAGCAGAACAAA |
| Chr2:217552212-217552235 | CAAACTAGGATTTGGGGTTGTGAC |
| Chr2:217573508-217573530 | ATTCAGAGCAGGCACCCAACTAC |
| Chr2:218072395-218072416 | GTTGGTCTCTGAAGCTCCCCAC |
| Chr8:127889381-127889401 | GAATGATGGGAACTGCAATCG |
| Chr8:128342831-128342853 | TCTGCAGACGCTCTAACGTTCTT |
| Chr8:128653429-128653451 | GTCTTAGCCCTTATCAAACACCA |
| Chr8:128745916-128745939 | CCCAATAAATCCAGTGTCTTGCTT |
| Chr8:128756904-128756926 | TGGTTGGAGACGACTGTAAATGA |
| Chr8:128764045-128764068 | GTCTTCTGAGATGCAGGATGCTTA |
| Chr8:130540919-130540942 | CTAACAGTGGAGAGGTGATCCAAC |
| Chr8:130549394-130549420 | GAGTAAATGCCAAAGACTACTTAGCTG |
| Chr8:130601333-130601356 | CCCTGAAGTCTAGAGACCATTTTG |
| Chr8:130662641-130662667 | TCTGATTTGGTAGAATTTACTCTGCAT |
| Chr9:111035858-111035877 | gcaaaggtggtCacgctagt |
| Chr9:110888426-110888448 | GACACACATACAAGCCGAAAACA |
| Chr9:110838221-110838243 | AAAAGGAGGCCTACGTTCATCCT |
| Chr9:110775664-110775685 | CTGCATGTGGGTTGTCCTACAG |
| Chr9:110429803-110429822 | TGAGGCCACTCTGAAGGTCT |
| Chr9:110311305-110311326 | AATTATGCCCAGGAGATGATCC |
| Chr9:110242015-110242037 | TACAAAACCAATGCACTCAGGTG |
| Chr9:110195031-110195052 | GCCGAAGAGTGACAAAAGATGC |
| Chr9:110069067-110069088 | GCTATCAAAACAGACGCAGCAT |
| Probe Location | Probe Sequence |
| Chr2:218261753-218261776 | TACTGAGCAGAAGCTCTGGGAGGA |
| Chr8:127889403-127889422 | CAGCTCTGCACCAACGTGCC |
| Chr9:111035786-111035809 | aaagagggaaccagtgcctctgtt |

**Supplementary Table 18: PCR primers and TaqMan assays used for mRNA quantification**

| Target | Primer Sequence |
| --- | --- |
| *IGFBP5* Fwd | AAGATCGAGAGAGACTCCCGT |
| *IGFBP5* Rev | CCGACAAACTTGGACTGGGT |
| *NSMCE2* Fwd | CAAGAGCCCGCTCTCACTTT |
| *NSMCE2* Rev | AGTGCTTGATTCTGGTAGTCCAA |
| *GAPDH* Fwd | CAAGGTCATCCATGACAACTTTG |
| *GAPDH* Rev | GGGCCATCCACAGTCTTCTG |
| *KLF4* | TaqMan assay ID: Hs00358836_m1 (Life Technologies, Carlsbad, CA, USA) |
| *MYC* | TaqMan assay ID: Hs00153408_m1 (Life Technologies, Carlsbad, CA, USA) |
| *DIRC3* | TaqMan assay ID: Hs03676702_ml (Life Technologies, Carlsbad, CA, USA) |
| *PVT1* | TaqMan assay ID:Hs.PT.56a.40859305 (Integrated DNA,Technologies, Coralville, IA, USA) |
| *GAPDH* | Taqman assay ID: Hs03929097_gl (Life Technologies, Carlsbad, CA, USA) |

**Supplementary Table 19: PCR primers used for detection of FOXA1 binding to rs4442975 and HOXB13 binding to rs12613955**

| Target | Primer Sequence |
| --- | --- |
| rs4442975 fwd | GTTTCCCCAGGCTTGTTCTC |
| rs4442975 rev | ACCGTCAGCCACCATATCTC |
| neg rs4442975 fwd | TGGCCATTTCTGAAAGGAAG |
| neg rs4442975 rev | CACTGCATGGGAAGAACTGA |
| rs4442975-seq fwd | AGCCCTGGAATTTTGGTGAT |
| rs4442975-seq rev | AAATCTCCCTCAGGAGCCAC |
| rs12613955 fwd | gtaggggcctagtgtggtca |
| rs12613955 rev | GAAGGATCCTGTCTGCAAGC |
| neg rs12613955 fwd | AGTGGAATGGGCAAAGCTAA |
| neg rs12613955 rev | GATGCTGATTCCTGGCCTTA |
