# Supplementary material for: Unbiased analysis of potential targets of breast cancer susceptibility loci by Capture Hi-C
Source: HighWire-hosted journal article supplement (doi:10.1101/gr.175034.114), 2014-08-13
Supplement: SuppFigureLegends.docx [file SuppFigureLegends.docx]

**Supplementary Figure 1: Genome plots of amplifications, gains, deletions and losses in BT483, SUM44, MCF7 and GM06990.** Copy number variations, expressed as log2 ratios (x-axis) are plotted against each clone according to genomic location (y-axis) for the karyotypically abnormal breast cancer cell lines (A) BT483, (B) SUM44, (D) MCF7 and for the karyotypically normal lymphoblastoid cell line (C) GM06990. Regions of gain are indicated in green, regions of loss are indicated in red and regions that are copy number neutral are indicated in black. CBS-smoothed ratios are co-plotted in purple.

**Supplementary Figure 2: Statistically significant CHi-C interaction peaks within a 5Mb window either side of the 2q35, 9q31.2 and 8q24.21 capture regions.** The number of statistically significant interaction peaks mapping to each HindIII fragment (y-axis) is plotted against the genomic location of the HindIII fragment (x-axis) for an approximately 10Mb region centred on the genomic region that was targeted in the sequence capture step of our CHi-C protocol. The capture region is denoted by a double-headed red arrow; the “bait end” of the interaction peaks (ie the end that maps to the capture region) is indicated in red, the target end (ie the region that maps outside the capture region) is indicated in green. (A) 2q35 risk locus (212,609,776-223,362,744 bps), (B) 9q31.2 risk locus (105,758,376-116,099,364 bps) and (C) 8q24.21 risk locus (122,886,760-133,470,692 bps).

**Supplementary Figure 3: CHi-C interaction peaks aligned with 3C interaction frequencies.** To validate the results of our CHi-C analysis we designed primers to quantify relative interaction frequencies between a single bait fragment per capture region and multiple targets including CHi-C interaction peaks and control regions. The number of significant interaction peaks mapping to each HindIII fragment (y-axis, CHi-C) and the relative interaction frequency (y-axis; 3C) is plotted against the genomic location of the HindIII fragment (x-axis; CHi-C) and primers (x-axis; 3C) The bait fragments are shown in red (Capture Hi-C) or as a dotted line (3C) and the targets are shown in green (Capture Hi-C) or as red, green or blue circles with error bars (standard error of the mean; 3C). (A) 2q35; 3C relative interaction frequencies. (B) 9q31.2; 3C relative interaction frequencies. * 9q31.2 SUM44 data shows CHi-C interaction peaks that were significant at a false discovery rate of 10% for SUM44 libraries and 1% for BT483 libraries. (C) 8q24.21; 3C relative interaction frequencies.

**Supplementary Figure 4: Two-way heatmap of interaction peaks between fragments that both map within the 2q35 capture region in GM06990 cells.** The location of the capture region is indicated by a red double headed arrow with the numbering of the HindIII fragments indicated above. For each interaction peak the genomic location of centromeric fragment is plotted on the y-axis and the genomic location of the telomeric fragment is plotted on the x-axis. The colour intensity of each square represents the statistical significance of the interaction peak from dark red (P = 1 x 10-10) to light red (P ≤ 0.01). Interaction peaks with a false discovery corrected P value of > 0.01 are not shown.

**Supplementary Figure 5: Levels of expression of target genes and lncRNAs in BT483, SUM44, MCF7 and GM06990 cells.** Levels of expression of (A) *IGFBP5*, (B) *KLF4*, (C) *MYC*, (D) *NSMCE2*, (E) *DIRC3* and (F) *PVT1* relative to the housekeeping gene *GAPDH* in BT483, SUM44, MCF7 and GM06990 cells.

**Supplementary Figure 6: Pyrosequencing of *IGFBP5*.** Upper panel: The *IGFBP5* gene, aligned with markers of genome organisation (CTCF and RAD21), histone marks associated with active enhancers (H3K4me1 and H3K27ac), active promoters (H3K4me3) and repressed enhancers (H3K27me3) generated by the ENCODE project in MCF7 cells. The location of four CpG di-nucleotides that were assayed by pyrosequencing is indicated by a series of vertical arrows. The 48 base pair sequence (5’ to 3’) to which these CpG sites map is shown directly below with the methylated sites (C’s) in red. Lower panel: Pyrosequencing traces for BT483, SUM44, MCF7 and GM06990 cells are shown. All four CpG sites are predominantly methylated (>60%) in MCF7 cells but not in the other cell lines.

**Supplementary Figure 7: HOXB13 ChIP-qPCR data.** HOXB13 ChIP-qPCR for rs339331 (positive control) and a region at Xq26 (negative control), both from Huang et al 2014, rs12613955 (test region) and an additional control region at 2q35 mapping 1.6kb telomeric to rs12613955 that showed no evidence active histone modification marks in MCF7 cells analysed as part of the ENCODE project. Mean +/- standard deviation for three technical replicates.
