# Supplementary figures and images for: Unbiased analysis of potential targets of breast cancer susceptibility loci by Capture Hi-C
Source: HighWire-hosted journal article supplement (doi:10.1101/gr.175034.114), 2014-08-13

# BT483

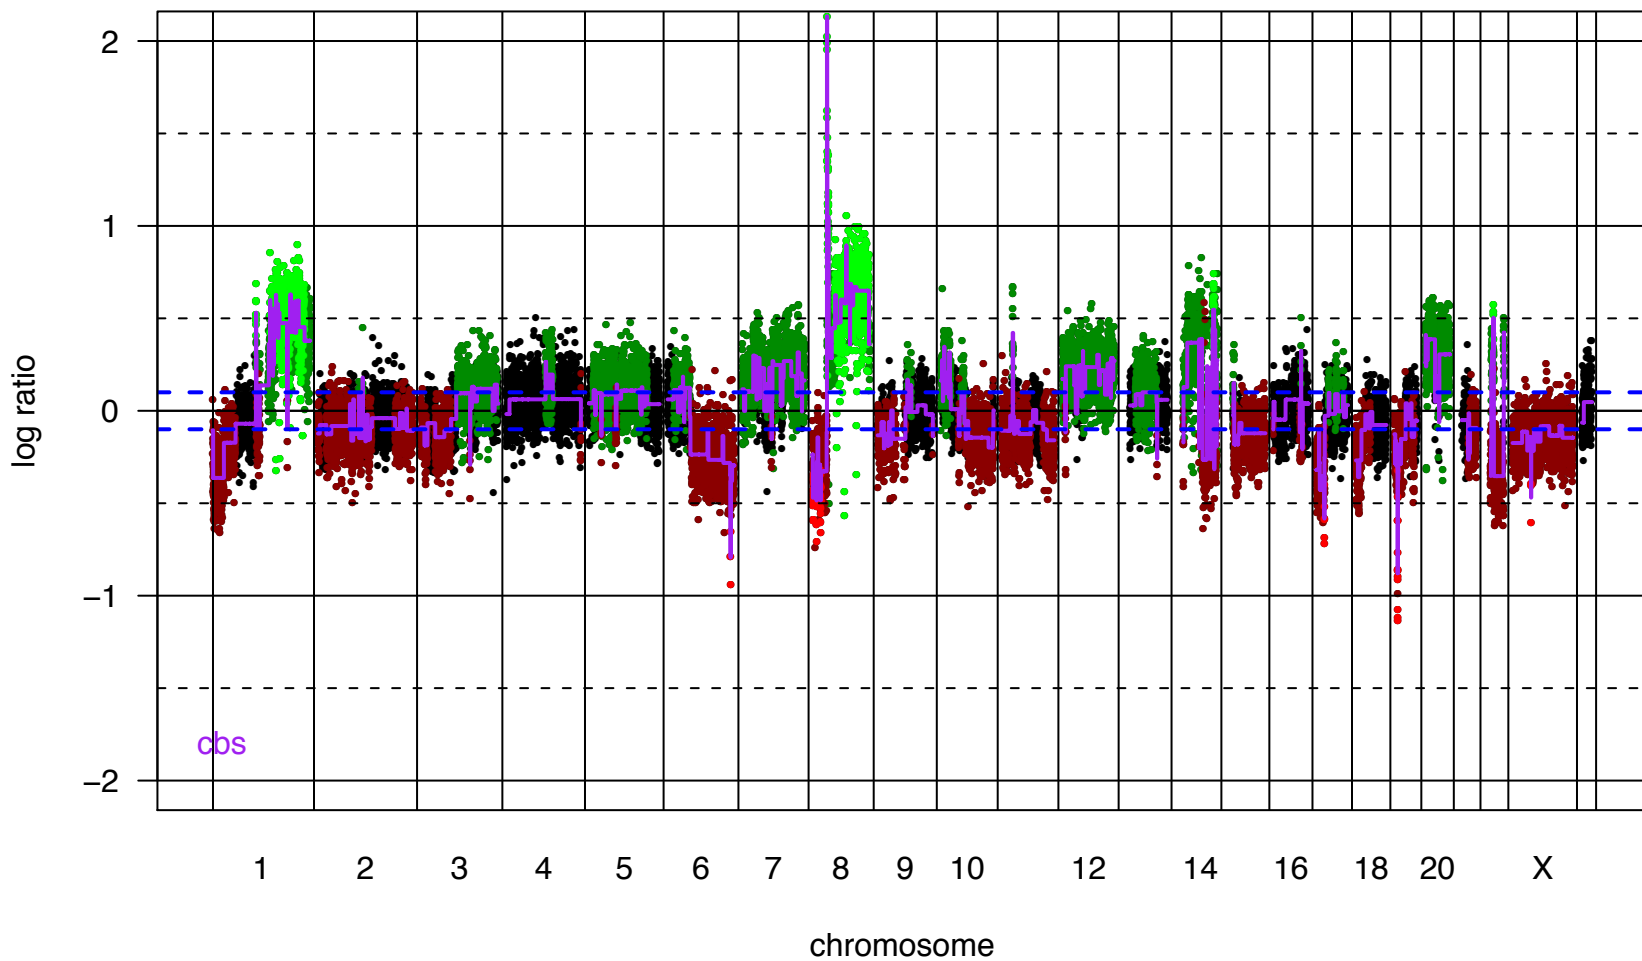

Supplement: Supplementary_Figure_1A.pdf [file Supplementary_Figure_1A.pdf]

# SUM44

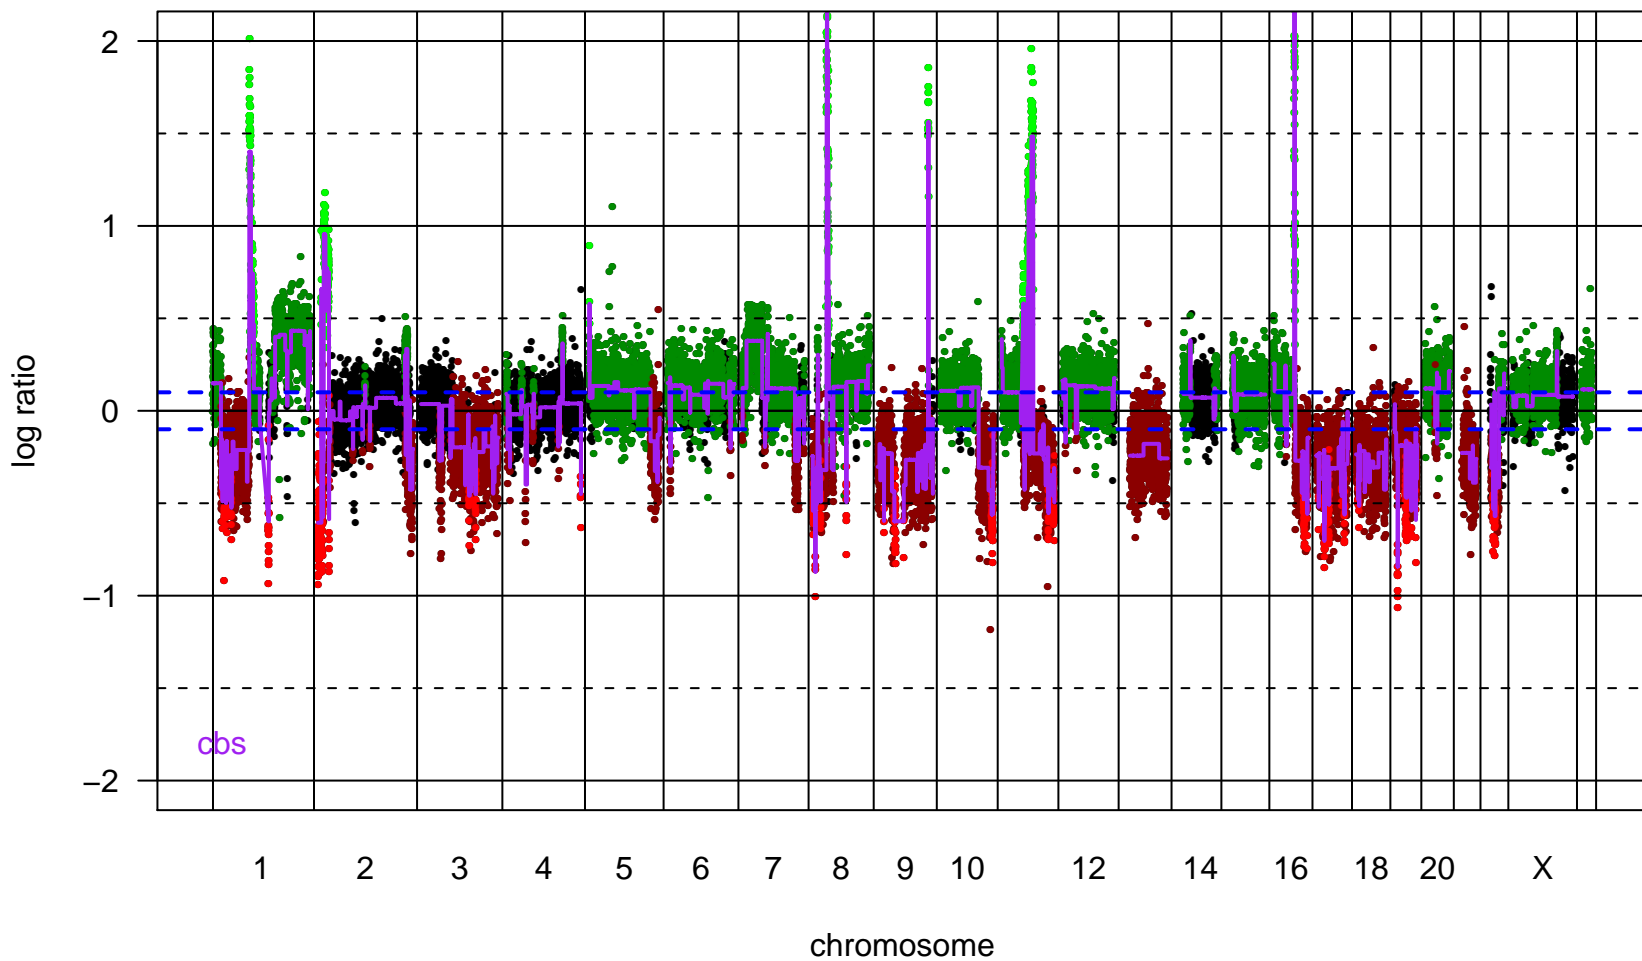

Supplement: Supplementary_Figure_1B.pdf [file Supplementary_Figure_1B.pdf]

# GM06990

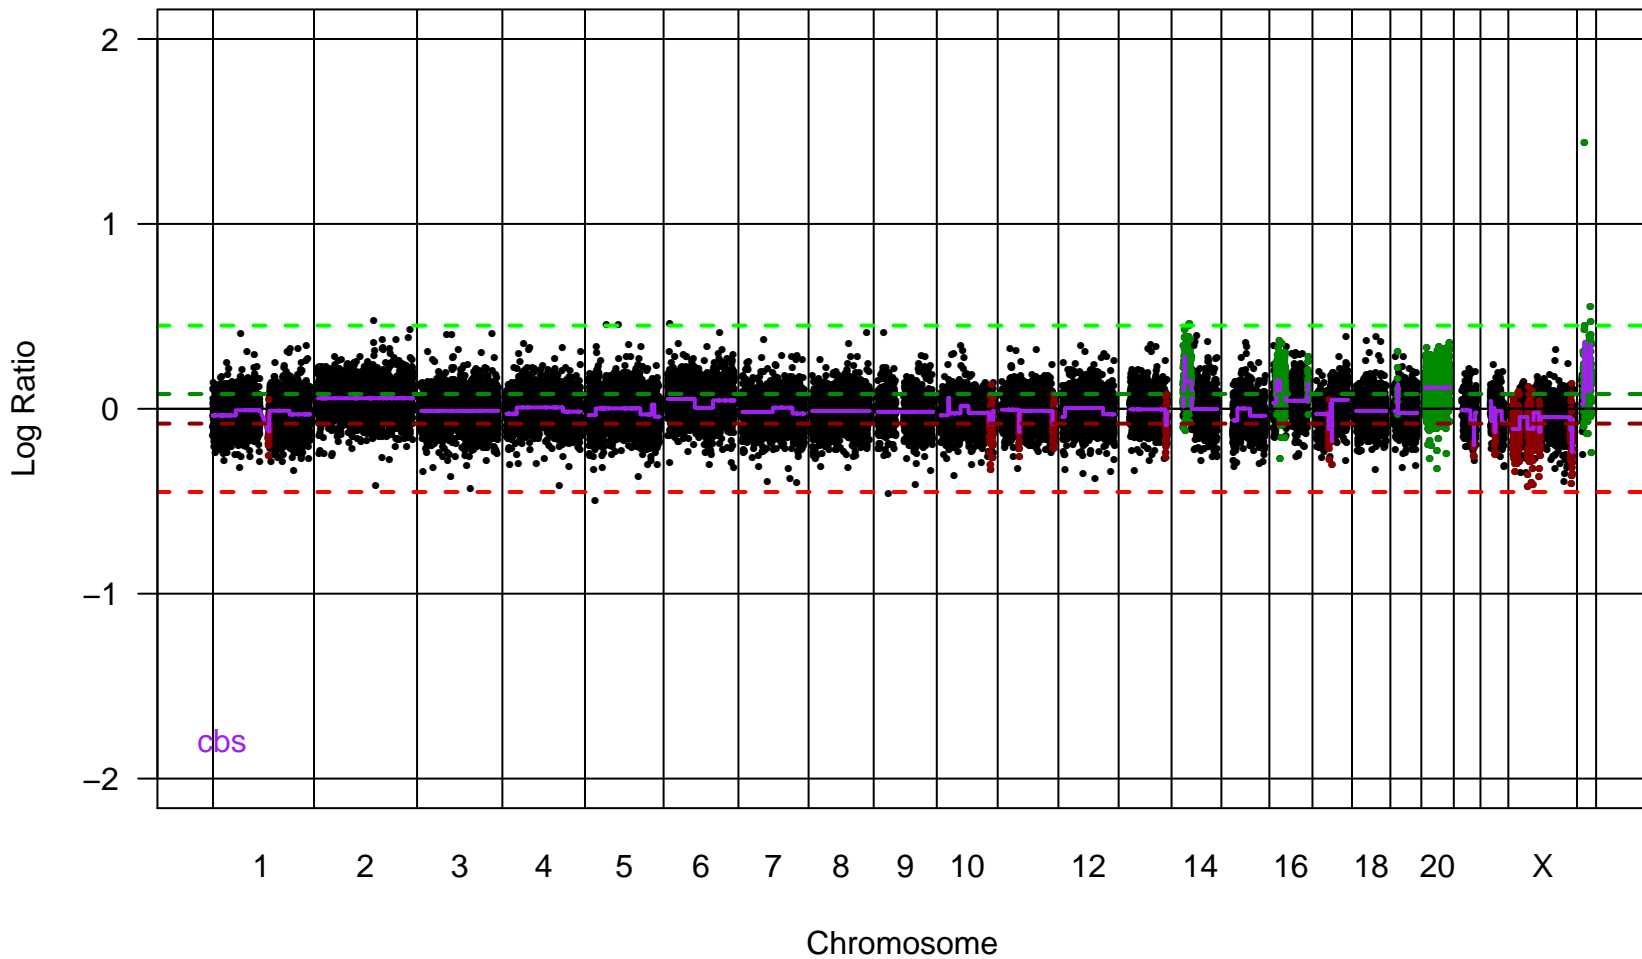

Supplement: Supplementary_Figure_1C.pdf [file Supplementary_Figure_1C.pdf]

# MCF7

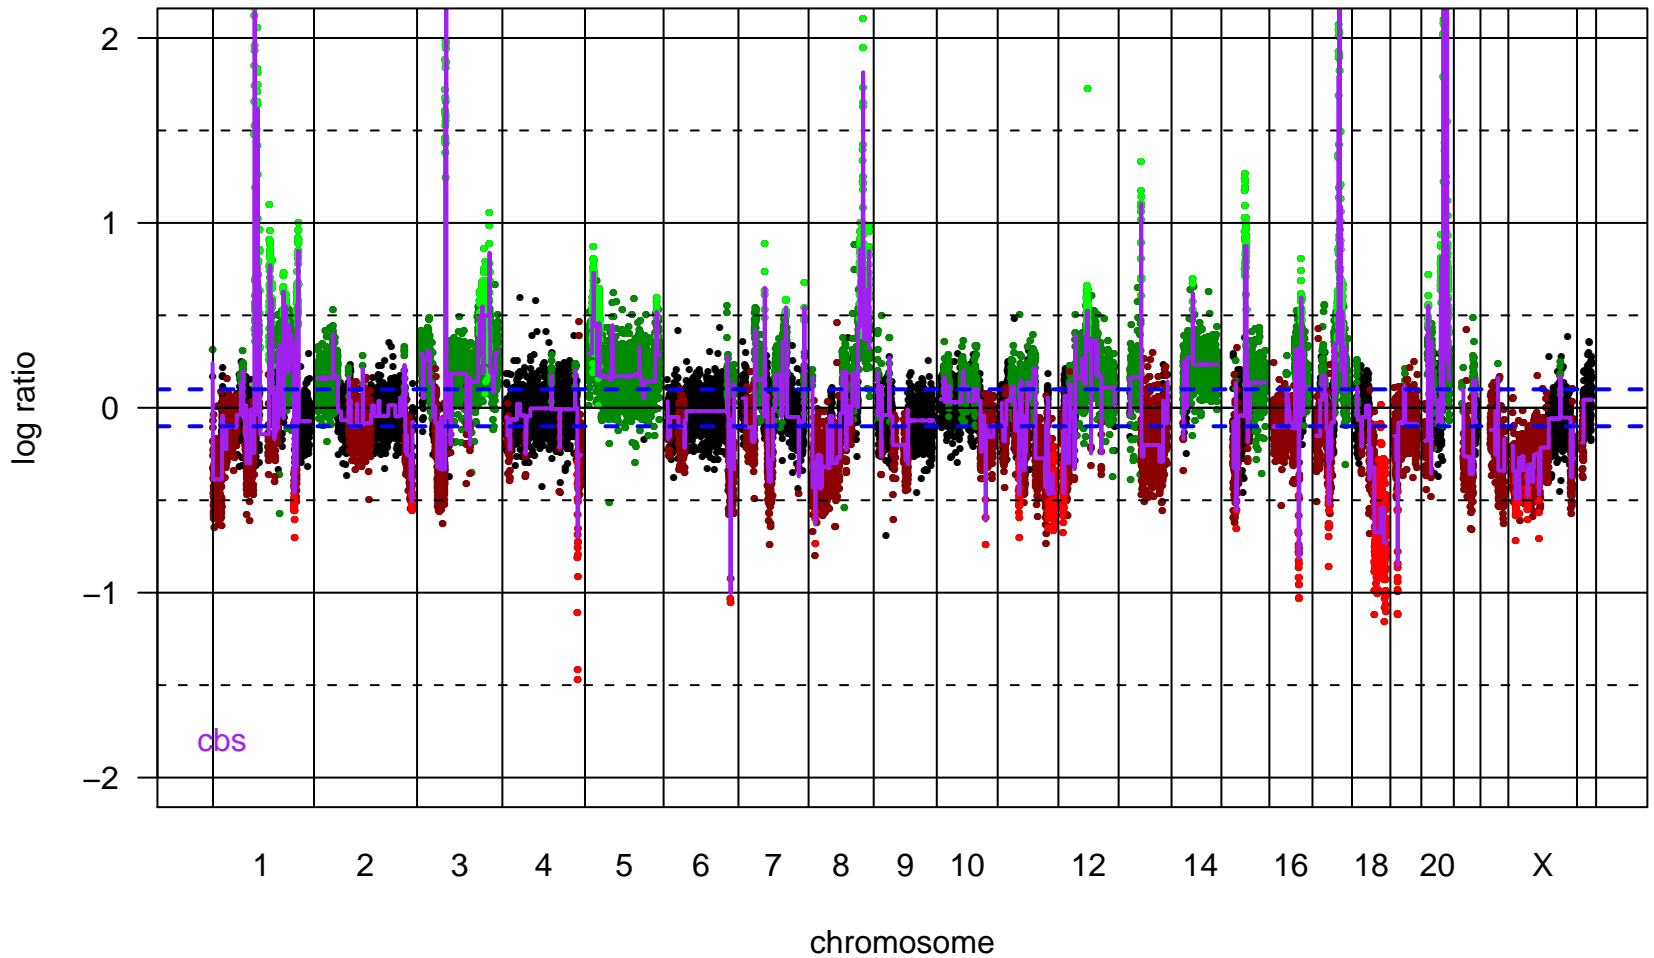

Supplement: Supplementary_Figure_1D.pdf [file Supplementary_Figure_1D.pdf]
